# Supplementary material
Source: Elsevier journal article supplement (https://rcastoragev2.blob.core.windows.net/aebb1175d4ab6f54e8bc96e363c93c15/mmc1.pdf)
Supplement: mmc1 [file mmc1.pdf]

## **Supplemental information**

### **The non-muscle ADF/cofilin-1 controls sarcomeric actin filament integrity and force production in striated muscle laminopathies**

**Nicolas Vignier, Maria Chatzifrangkeskou, Luca Pinton, Hugo Wioland, Thibaut Marais, Mégane Lemaitre, Caroline Le Dour, Cécile Peccate, Déborah Cardoso, Alain Schmitt, Wei Wu, Maria-Grazia Biferi, Naïra Naouar, Coline Macquart, Maud Beuvin, Valérie Decostre, Gisèle Bonne, Guillaume Romet-Lemonne, Howard J. Worman, Francesco Saverio Tedesco, Antoine Jégou, and Antoine Muchir**

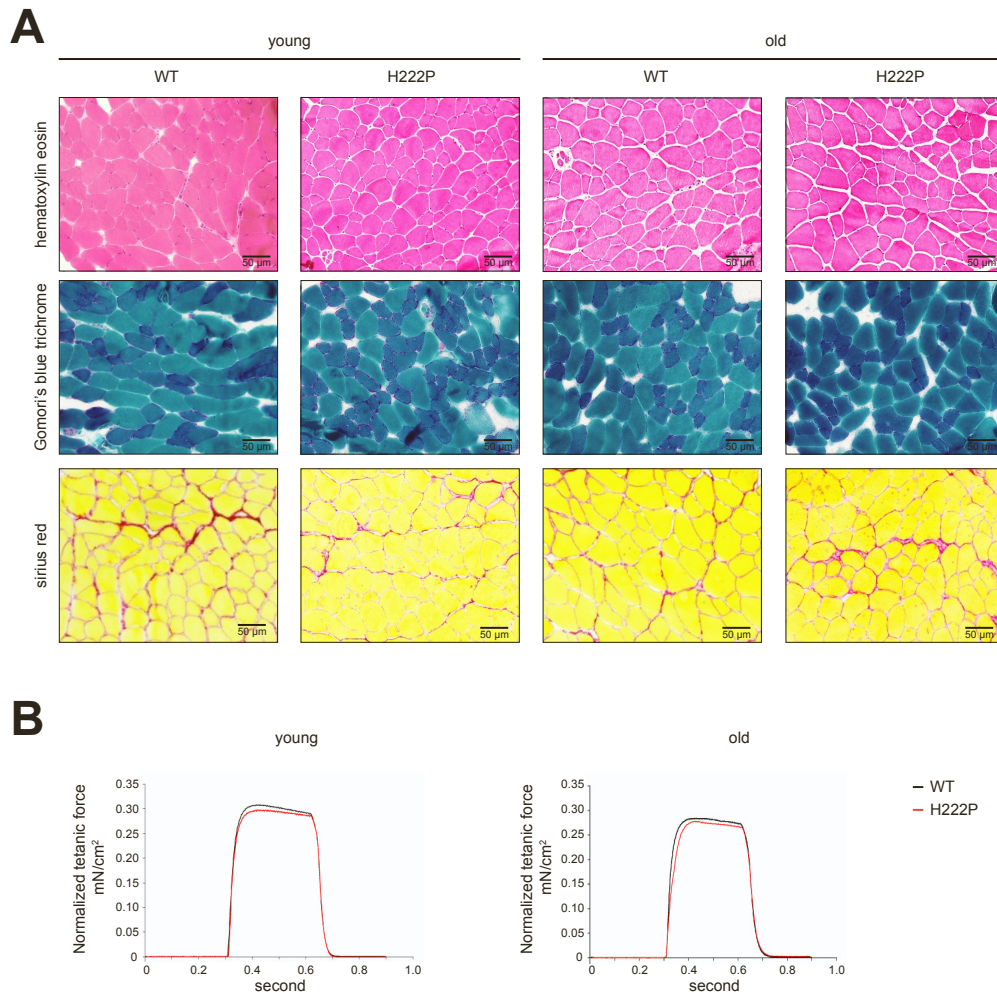

**Figure S1. Skeletal muscle structure and function of fast twitch EDL muscle from *Lmna*<sup>p.H222P/H222P</sup> mice, related to Figure 1.**

**(A)** Histochemical analysis of EDL from young and old, wild type (WT) and *Lmna*<sup>p.H222P/H222P</sup> (H222P) mice. Sections of EDL muscles were stained with hematoxylin and eosin, modified Gomori's Trichrome, and Sirius red. Scale bar = 50  $\mu$ m.

**(B)** Representative curves of tetanic forces of EDL muscle from young and old, wild type (WT) and *Lmna*<sup>p.H222P/H222P</sup> (H222P) mice.

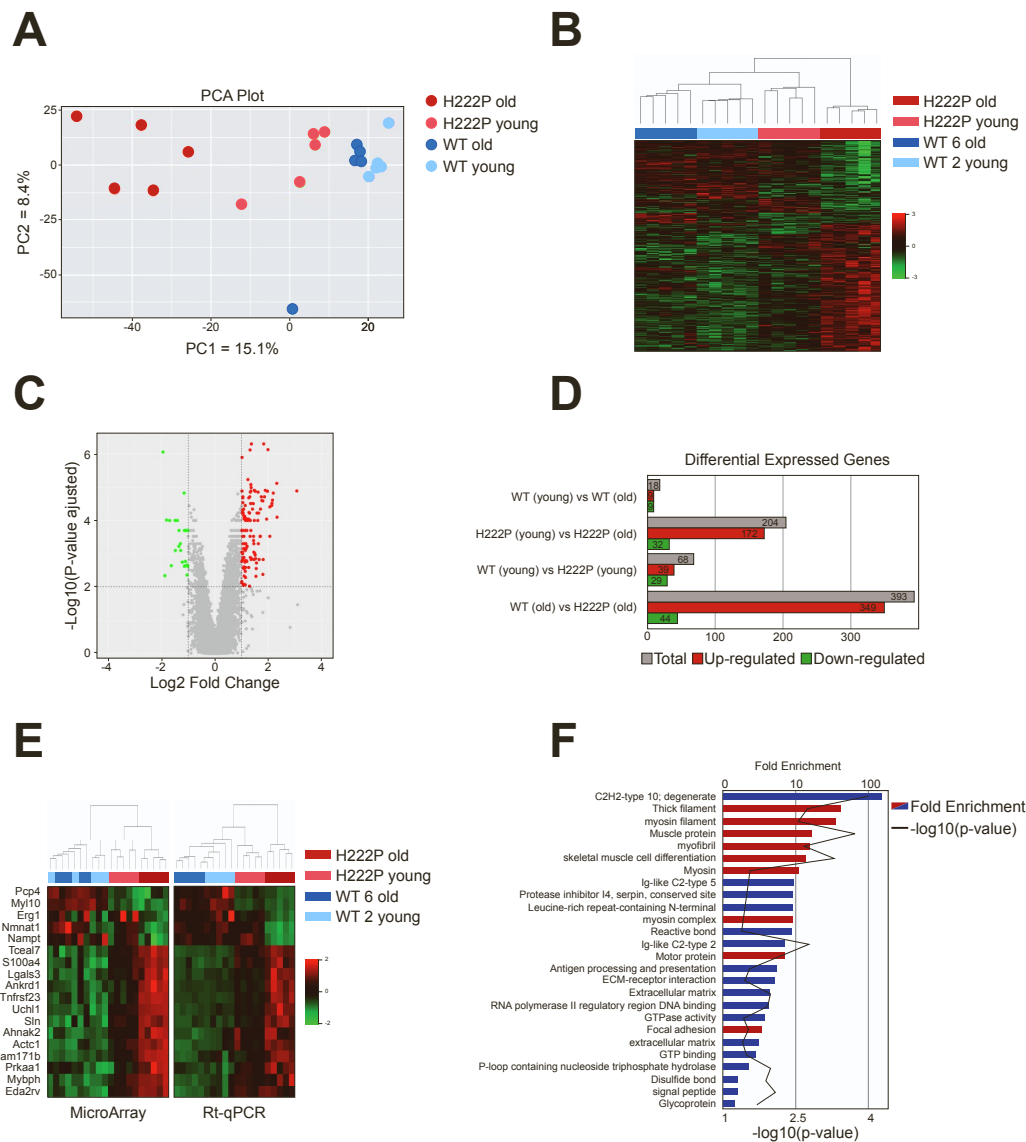

**Figure S2. Transcriptomic analysis of *Lmna*<sup>p.H222P/H222P</sup> mice soleus muscle, related to STAR Methods.**

**(A)** Principal component analysis (PCA) of the Affymetrix's probe sets detected in the soleus from young and old wild, type (WT) (n=5) and *Lmna*<sup>p.H222P/H222P</sup> (H222P) (n=5) mice.

**(B)** Unsupervised hierarchical clustering of the Affymetrix probe sets detected in the soleus from young and old, wild type (WT) (n=5) and *Lmna*<sup>p.H222P/H222P</sup> (H222P) (n=5) mice. Branch lengths of the dendrogram (top of the panel) represent similarity of the expression pattern between the samples.

**(C)** Volcano plot of fold change value (log<sub>2</sub> Fold Change) and the p value (-log<sub>10</sub> p-values adjusted) for each probe from young (n=5) and old (n=5) *Lmna*<sup>p.H222P/H222P</sup> (H222P) mice. A 2-fold threshold and p < 0.01 were used to determine the probe set significantly altered.

**(D)** Schematic representation of the dysregulated genes number in soleus from young and old, wild type (WT) (n=5) and *Lmna*<sup>p.H222P/H222P</sup> (H222P) (n=5) mice.

**(E)** Supervised hierarchical clustering analysis of a set of genes quantified by Affymetrix Microarray (left panel) and RT-qPCR (right panel) in the soleus from young and old, wild type (WT) (n=5) and *Lmna*<sup>p.H222P/H222P</sup> (H222P) (n=5) mice.

**(F)** Schematic representation of the best 26 gene ontology (GO) terms score obtained from DAVID analysis of soleus from young and old *Lmna*<sup>p.H222P/H222P</sup> (H222P) (n=5) mice.

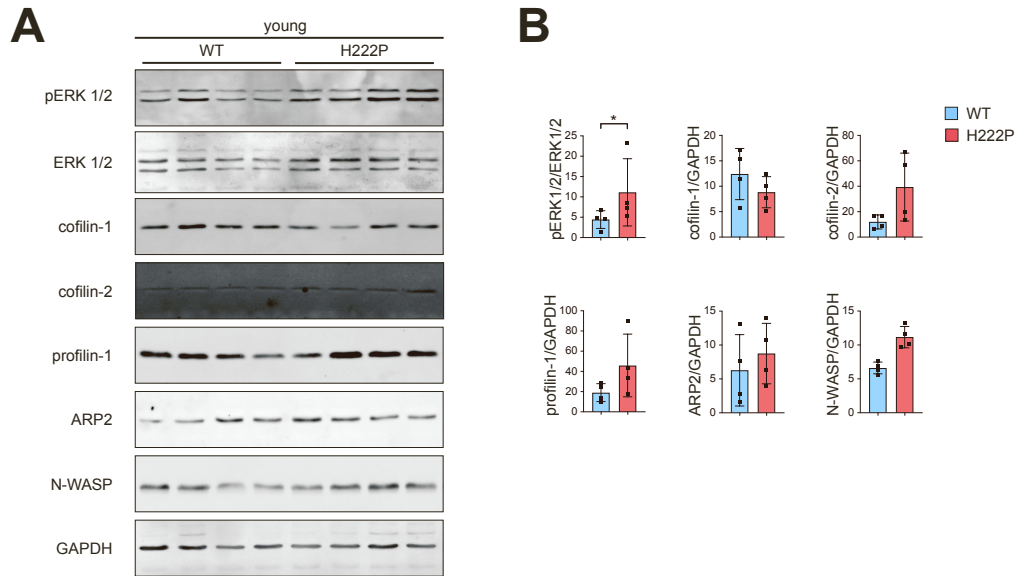

**Figure S3. Cofilin-1 expression in soleus from young *Lmna*<sup>p.H222P/H222P</sup> mice, related to Figure 2.**

**(A)** Immunoblots showing pERK1/2, ERK1/2, cofilin-1, cofilin-2, profilin-1, ARP2/3 and N-WASP expression levels in soleus from young wild type (WT) (n=4) and *Lmna*<sup>p.H222P/H222P</sup> (H222P) (n=4) mice. GAPDH is shown as loading control.

**(B)** Relative expression of pERK1/2, cofilin-1 and profilin-1 in the soleus from young wild type (WT) (n=4) and *Lmna*<sup>p.H222P/H222P</sup> (H222P) (n=4) mice. \*p<0.01 between young wild type (WT) and *Lmna*<sup>p.H222P/H222P</sup> (H222P). Data are represented as mean ± SD.



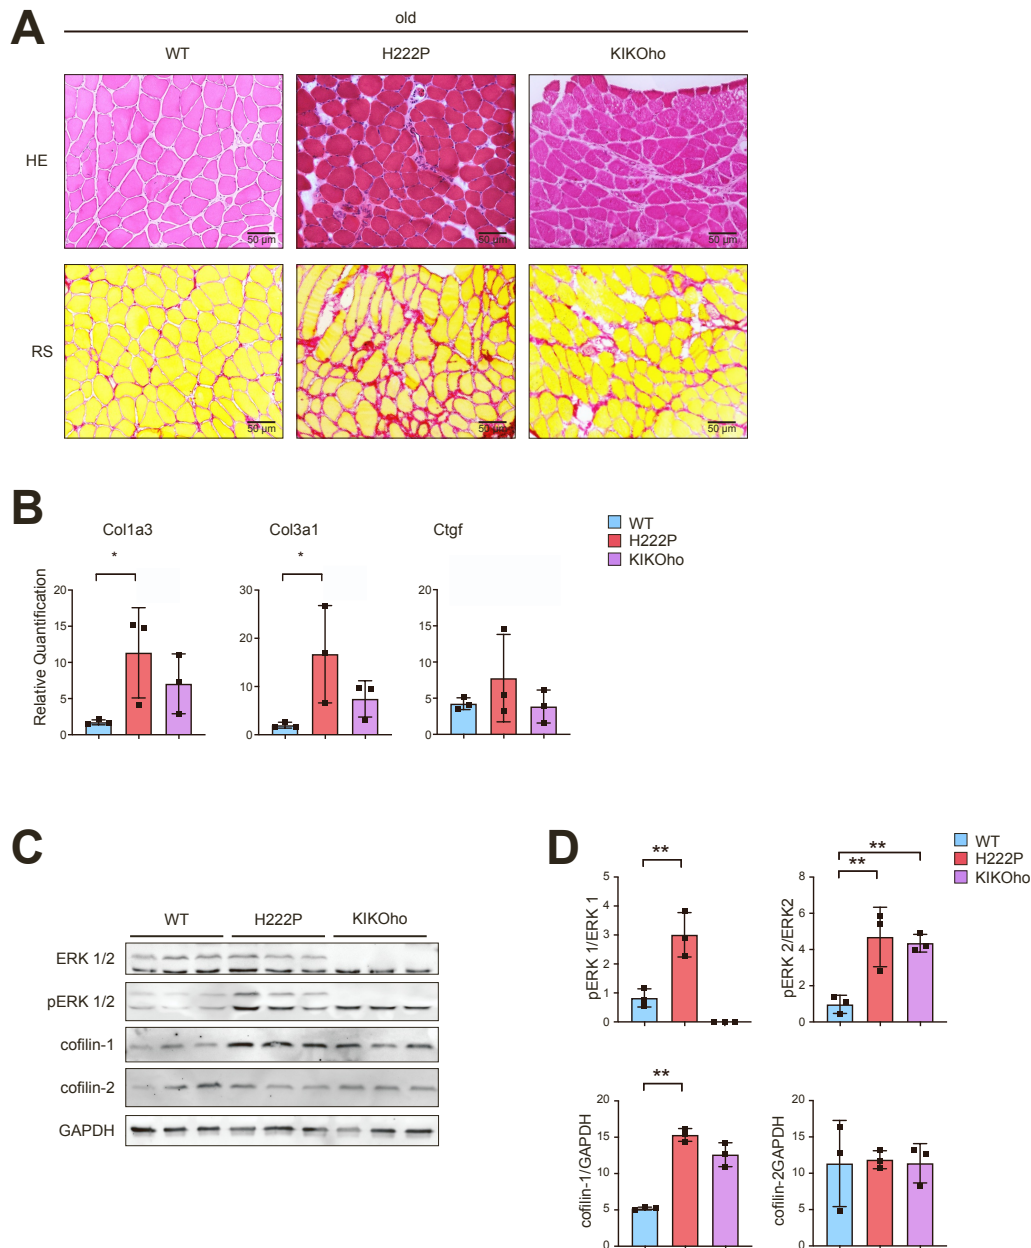

**Figure S4. Loss of ERK1 in *Lmna*<sup>p.H222P/H222P</sup> mice improves soleus muscle integrity, related to Figure 3.**

**(A)** Histochemical analysis of soleus from old, wild type (WT), *Lmna*<sup>p.H222P/H222P</sup> (H222P) and *Lmna*<sup>p.H222P/H222P</sup> mice lacking Erk1 (KIKOho) mice. Sections of soleus muscles were stained with hematoxylin and eosin and Sirius red. Scale bar = 50  $\mu$ m.

**(B)** Expression of fibrosis-related genes (*Col1a2*, *Col3a1* and *Ctgf*) in the soleus from old, wild type (WT) (n=3), *Lmna*<sup>p.H222P/H222P</sup> (H222P) (n=3) and *Lmna*<sup>p.H222P/H222P</sup> mice lacking Erk1 (KIKOho) (n=3) mice. Data are represented as mean  $\pm$  SD.

**(C)** Immunoblots showing pERK1/2, ERK1/2, cofilin-1 and cofilin-2 protein level in soleus from, old wild type (WT) (n=3), *Lmna*<sup>p.H222P/H222P</sup> (H222P) (n=3) and *Lmna*<sup>p.H222P/H222P</sup> mice lacking Erk1 (KIKOho) (n=3) mice. GAPDH is shown as loading control.

**(D)** Quantification of pERK1/2, ERK1/2, cofilin-1 and cofilin-2 protein level in soleus from old, wild type (WT) (n=3), *Lmna*<sup>p.H222P/H222P</sup> (H222P) (n=3) and *Lmna*<sup>p.H222P/H222P</sup> mice lacking Erk1 (KIKOho) (n=3) mice. \*\*p $\leq$ 0.001 between old, wild type (WT) and *Lmna*<sup>p.H222P/H222P</sup> (H222P) or *Lmna*<sup>p.H222P/H222P</sup> mice lacking Erk1 (KIKOho). Data are represented as mean  $\pm$  SD.

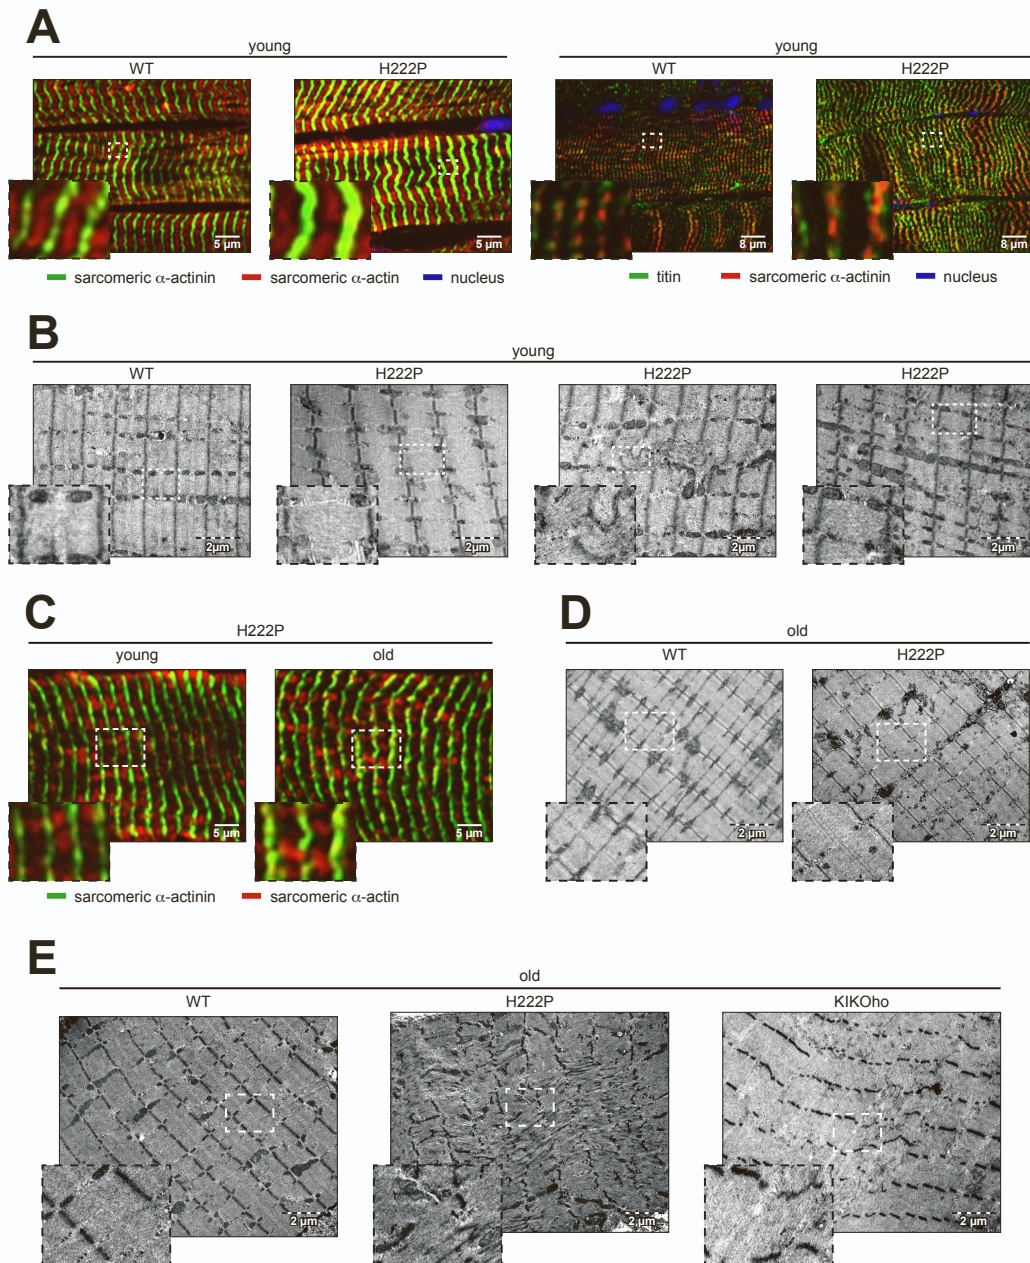

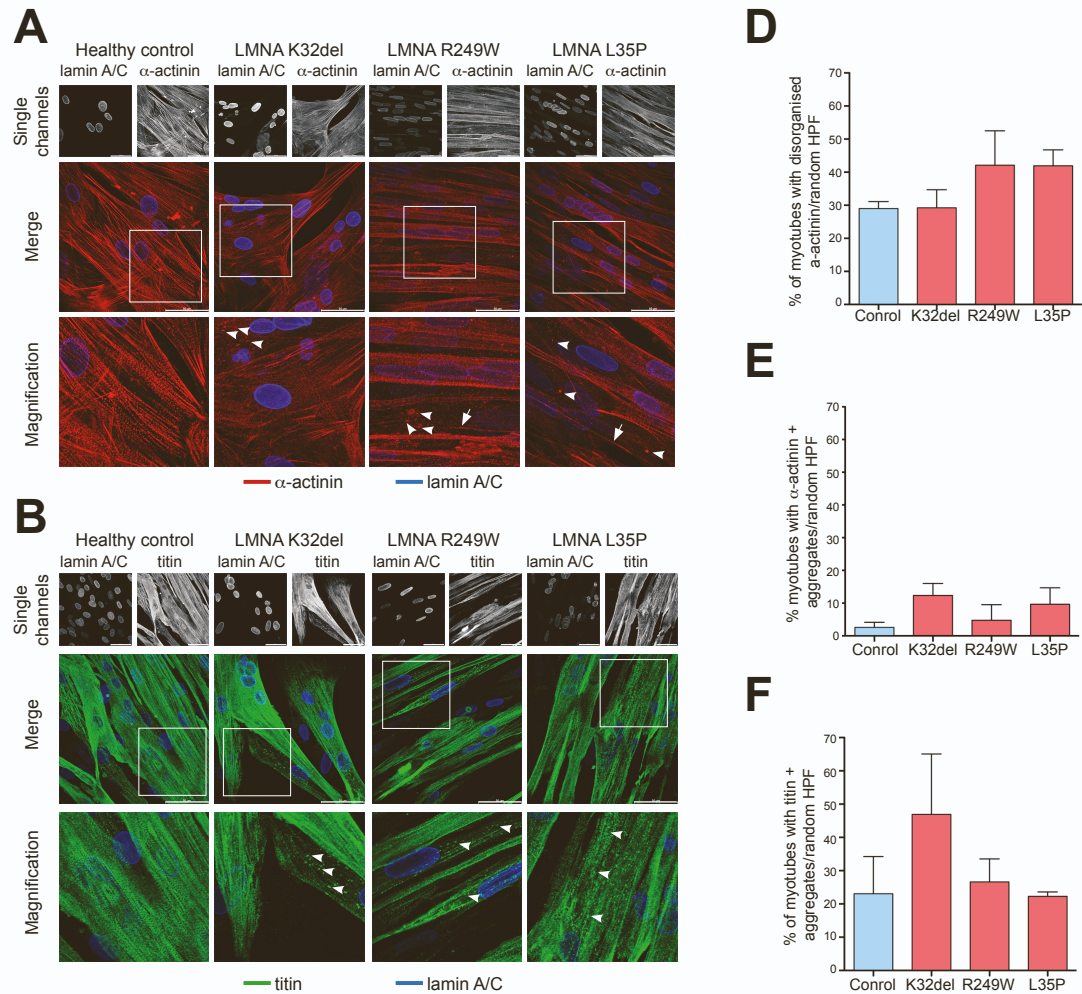

**Figure S6. Analysis of sarcomeric proteins in K32del, p.R249W and p.L35P *LMNA* mutant iPSC-derived myotubes, related to Figure 5.**

**(A)** Immunofluorescence images showing A-type lamins (blue) and sarcomeric α-actinin (red) staining of three *LMNA* mutants and one healthy control lines of human iPSC-derived myotubes. Arrows indicate myotubes with disorganised sarcomeric structure and arrowheads point at sarcomeric α-actinin aggregates. White boxes highlight magnified area in lower panels. Scale bar = 50 μm.

**(B)** Immunofluorescence of the three lines described in (A) showing A-type lamins (blue) and titin (green). Arrowheads indicate titin aggregates. White boxes highlight magnified area in lower panels. Scale bar = 50 μm.

**(C)** Graph quantifies the percentage of myotubes with disorganised/immature sarcomeres assessed by sarcomeric α-actinin staining. 9 to 15 randomly selected high-power fields (HPF) with 15 to 93 myotubes were imaged and analysed per cell line per repeat (n=3; Kruskal-Wallis test:  $p = 0.1659$ ). Data are represented as mean ± SD.

**(D)** Graph quantifies the percentage of myotubes with sarcomeric α-actinin-positive aggregates. Same pictures of panel (B) were analysed. (n=3; Kruskal-Wallis test:  $p = 0.2124$ ). Data are represented as mean ± SD.

**(E)** Graph quantifies the percentage of myotubes with titin-positive aggregates (n=3; Kruskal-Wallis test:  $p = 0.7273$ ). Data are represented as mean ± SD.



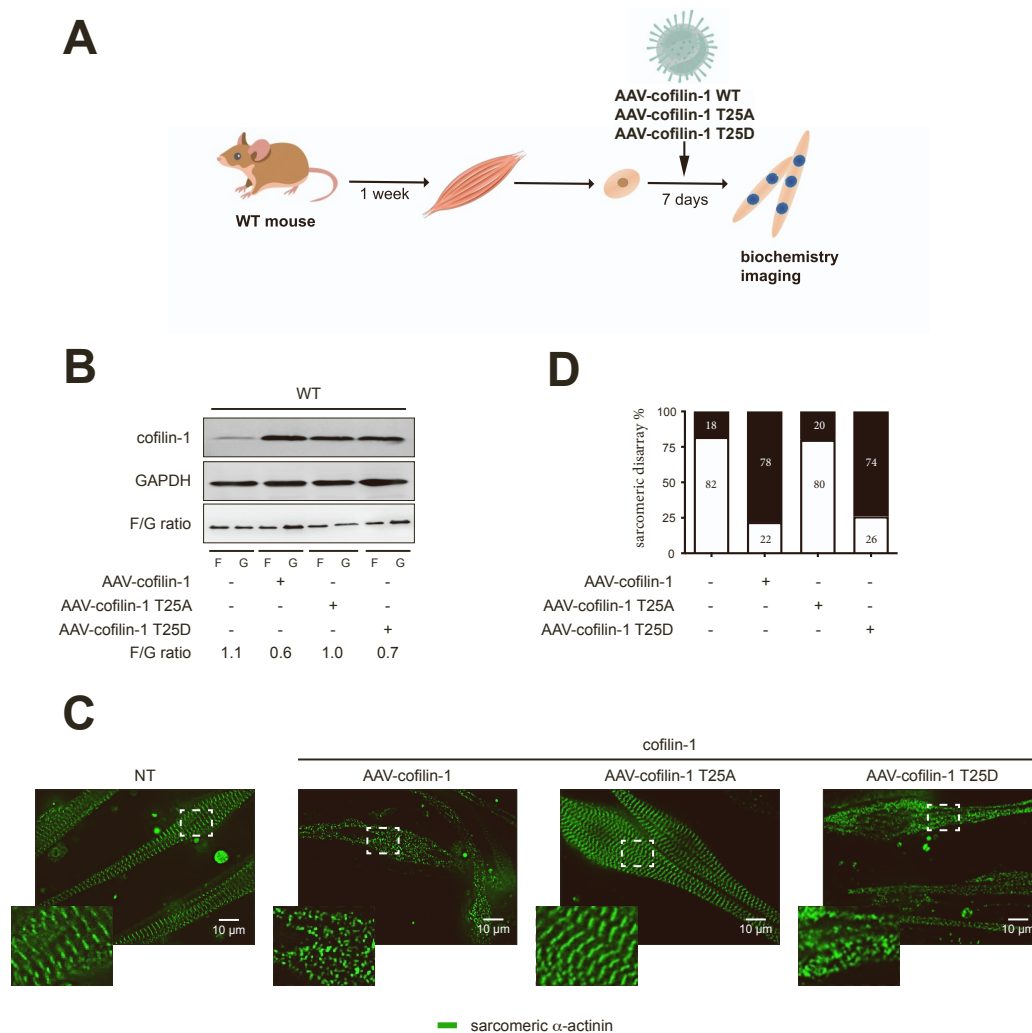

**Figure S7. Phospho(T25)-cofilin-1 drives sarcomeric disorganization, related to Figure 5.**

(A) Schematic representation of the experimental procedure for primary myoblasts isolation and differentiation to myotubes from 1-week-old wild type (WT) mice transduced with AAV vectors expressing cofilin-1 constructs.

(B) Immunoblots showing cofilin-1 protein expression level in myotubes derived from wild type mouse myoblasts (WT) and wild type mouse myoblast transduced with AAV vectors expressing cofilin-1 constructs. Representative immunoblot showing the effect of AAV expressing cofilin-1 constructs on G-actin and F-actin expression is shown.

(C) Immunofluorescence micrographs of α-actinin labeled myotubes (green) derived from wild type mouse myoblasts (WT) and wild type mouse myoblast transduced with AAV vectors expressing cofilin-1 constructs. Scale bar = 10 μm.

(D) Quantification of sarcomeric disarray from α-actinin labeled myotubes derived from wild type mouse myoblasts (WT) and wild type mouse myoblast transduced with AAV vectors expressing cofilin-1 constructs. (white bar: normal sarcomeric organization; black bar: sarcomeric disarray).

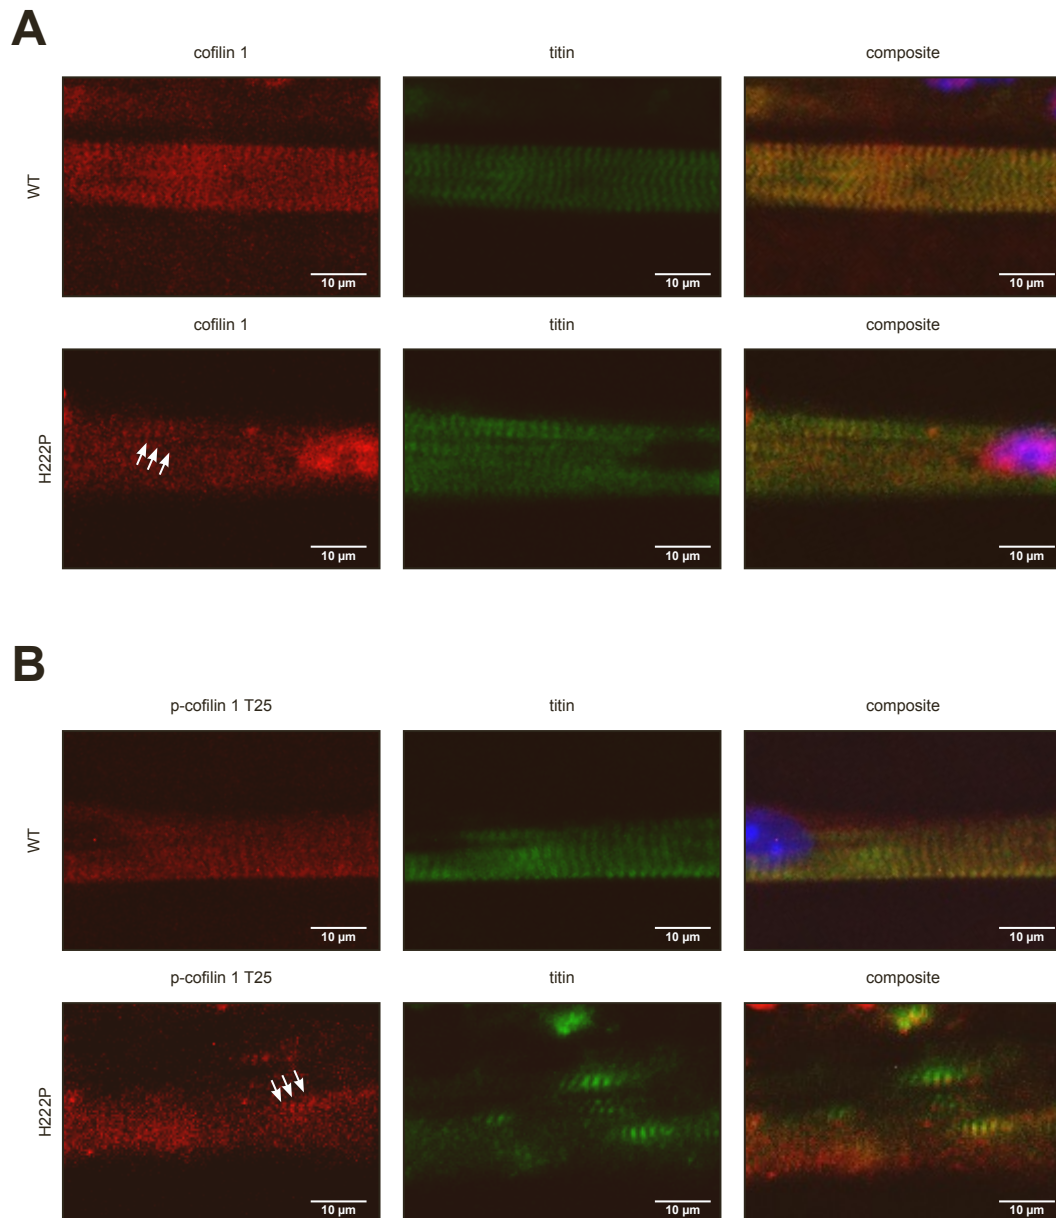

**Figure S8. Localization of cofilin-1 and phospho(T25)-cofilin-1 in muscle cells, related to Figure 5.**

**(A)** Immunofluorescence micrographs from old wild type (WT) and *Lmna*<sup>p.H222P/H222P</sup> (H222P) mice. Titin (green) shows the sarcomeric I-band and cofilin-1 (red) displays punctuate cytoplasmic localization (arrows), which does not overlap with myofibrils. Scale bar = 10  $\mu\text{m}$ .

**(B)** Immunofluorescence micrographs from old wild type (WT) and *Lmna*<sup>p.H222P/H222P</sup> (H222P) mice. Titin (green) shows the sarcomeric I-band and phospho(T25)-cofilin-1 displays punctuate cytoplasmic localization (arrows), which does not overlap with myofibrils. Scale bar = 10  $\mu\text{m}$ .

**A**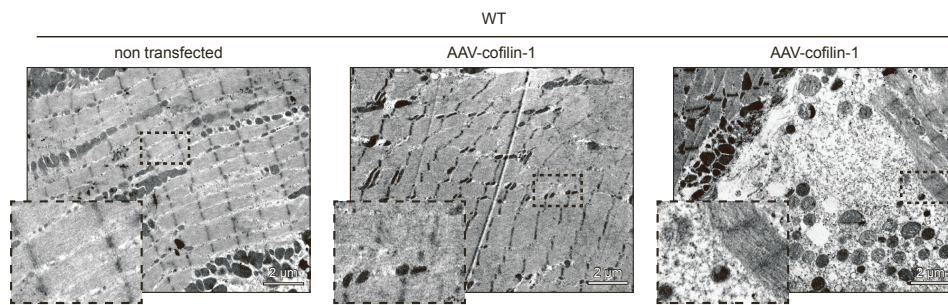

**Figure S9. Cofilin-1 is involved in the sarcomere disorganization *in vivo*, related to Figure 6.**

Electron micrographs showing myofilaments organization in soleus from wild type (WT) mice non-transfected or transfected with AAV vector expressing cofilin-1. Scale bar = 2 µm.

| Tetanic contraction                   |             |              |             |               |
|---------------------------------------|-------------|--------------|-------------|---------------|
| Young                                 |             | Old          |             |               |
|                                       | WT          | H222P        | WT          | H222P         |
| n muscles (n mice)                    | 12 (6)      | 12 (6)       | 14 (7)      | 9 (6)         |
| BW (g)                                | 26.7 ± 1.0  | 23.7 ± 1.3   | 27.6 ± 1.3  | 26.5 ± 1.9    |
| MW (mg)                               | 7.1 ± 0.3   | 5.9 ± 0.3    | 7 ± 0.4     | 6.5 ± 0.3     |
| l <sub>0</sub> (mm)                   | 10.5 ± 0.2  | 10.3 ± 0.3   | 9.8 ± 0.1   | 9.5 ± 0.1     |
| P <sub>0</sub> (mN)                   | 123.0 ± 8.0 | 109.1 ± 10.5 | 135.9 ± 8.7 | 91.4 ± 7.1**  |
| sP <sub>0</sub> (mN/mm <sup>2</sup> ) | 132.8 ± 9.7 | 136.9 ± 11.9 | 137.9 ± 7.0 | 96.3 ± 5.7*** |

| Twitch contraction                    |            |            |            |             |
|---------------------------------------|------------|------------|------------|-------------|
| Young                                 |            | Old        |            |             |
|                                       | WT         | H222P      | WT         | H222P       |
| n muscles (n mice)                    | 12 (6)     | 12 (6)     | 10 (5)     | 3 (3)       |
| BW (g)                                | 26.7 ± 1.0 | 23.7 ± 1.3 | 29.2 ± 1.2 | 26.4 ± 4.1  |
| MW (mg)                               | 7.1 ± 0.3  | 5.9 ± 0.3  | 7.7 ± 0.3  | 7.3 ± 0.7   |
| l <sub>0</sub> (mm)                   | 10.5 ± 0.2 | 10.3 ± 0.3 | 9.9 ± 0.1  | 9.2 ± 0.2   |
| P <sub>t</sub> (mN)                   | 28.1 ± 0.4 | 23.9 ± 7.7 | 26.7 ± 0.3 | 17.5 ± 2.7* |
| sP <sub>t</sub> (mN/mm <sup>2</sup> ) | 30.5 ± 3.5 | 30.0 ± 2.5 | 25.4 ± 2.8 | 15.6 ± 2.1* |
| HRT (ms)                              | 67.0 ± 4.3 | 67.3 ± 3.7 | 55.5 ± 5.3 | 57.7 ± 9.0  |
| TTP (ms)                              | 43.3 ± 2.0 | 46.2 ± 1.7 | 44.1 ± 2.5 | 41.7 ± 4.8  |

**Table S1. Ex vivo soleus tetanic and twitch force measurements from young and old, wild type (WT) and *Lmna*<sup>p.H222P/H222P</sup> (H222P) mice, related to Figure 1.**

Data are represented as mean ± SD. \*p≤0.01, \*\*p≤0.001, \*\*\*p≤0.0001 between old, wild type (WT) and *Lmna*<sup>p.H222P/H222P</sup> (H222P).
